# Supplementary material for: Physiological and Transcriptome Responses of Pinus massoniana Seedlings Inoculated by Various Ecotypes of the Ectomycorrhizal Fungus Cenococcum geophilum during the Early Stage of Drought Stress
Source: Preprints.org preprint supplement (doi:10.20944/preprints202312.1525.v1), 2023-12-20
Supplement: Supplementary file 1 [file supplementary]

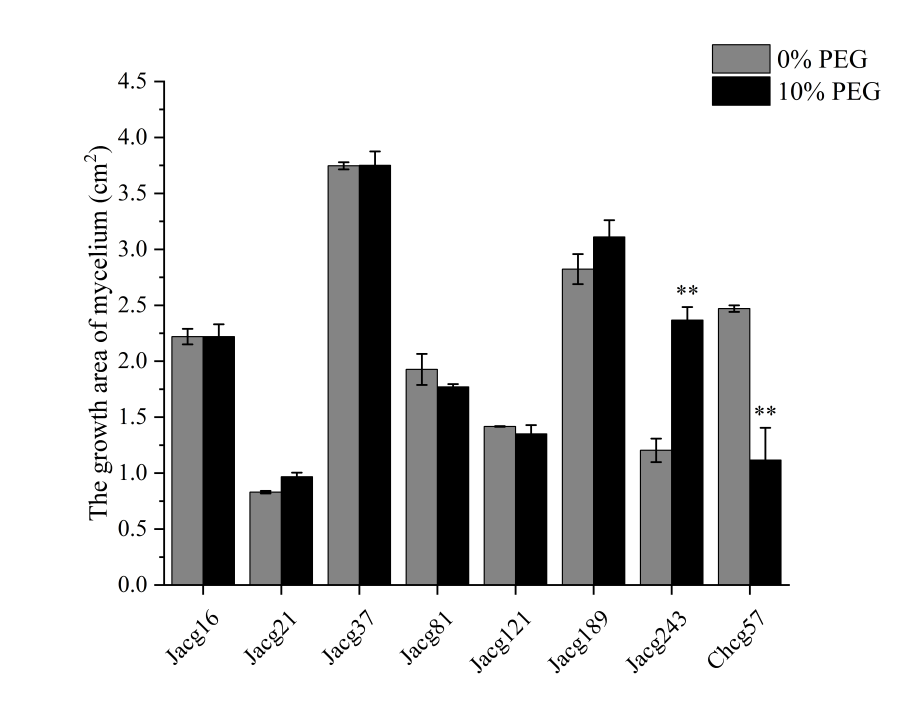


**Figure 1.** The mycelial growth of eight ecotypes of *Cenococcum geophilum* under drought and non-drought treatments. Data and bars are shown as mean and ± SE of the replicates, respectively (n=3). The statistically significant difference between 0% PEG and 10% PEG treatments is tested by Student’s *t*-test (** *P*<0.01).


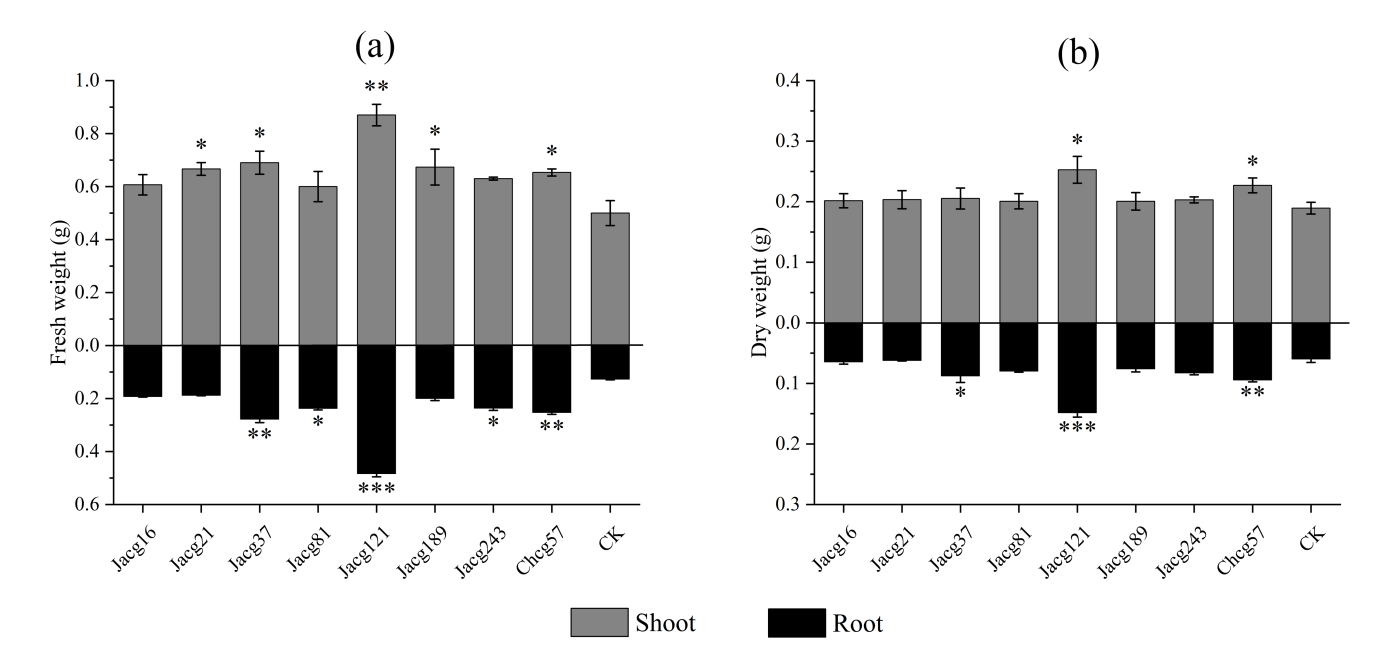


**Figure 2.** Effects of different *Cenococcum geophilum* ecotypes inoculation on (a) fresh weights and (b) dry weights of *Pinus massoniana* seedlings. Data and bars are shown as mean and ± SE of the replicates, respectively (n=3). The statistically significant difference between different *Cenococcum geophilum* ecotypes inoculation and non-inoculation treatments is tested by Mann-Whitney U test (* *P*<0.05; ** *P*<0.01; *** *P<*0.001). CK, non-inoculation.


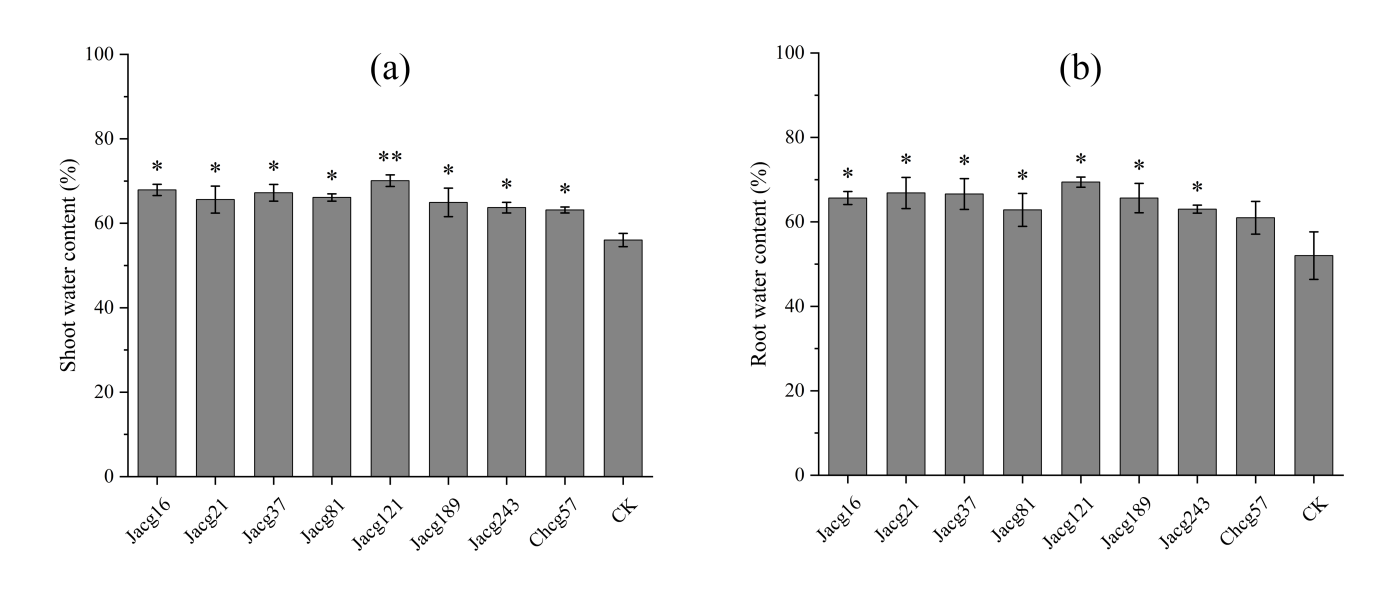


**Figure 3.** Effects of different *Cenococcum geophilum* ecotypes inoculation on the (a) shoot and (b) root water contents of *Pinus massoniana* seedlings after 7 days of drought stress treatment (field capacity 30%-35%). Data and bars are shown as mean and ± SE of the replicates, respectively (n=3). The statistically significant difference between different *C. geophilum* ecotypes inoculation and non-inoculation treatments is tested by Mann-Whitney U test (* *P*<0.05; ** *P*<0.01). CK, non-inoculated.

**Table 1.** Effects of inoculation with different *Cenococcum geophilum* ecotypes on photosynthetic parameters of *Pinus massoniana* seedlings after 7 days of drought stress treatment (field capacity 30%-35%).

| ID | Pn  (μmol·m-2·s-1) | Gs  (mol·m-2·s-1) | Ci  (μmol·m-2·s-1) | Tr  (mmol·m-2·s-1) |
| --- | --- | --- | --- | --- |
| Jacg16 | 1.57±0.06 | 0.023±0.001 | 322.17±4.37*** | 0.95±0.01 |
| Jacg21 | 2.45±0.32* | 0.019±0.004 | 214.01±3.12 | 1.00±0.02 |
| Jacg37 | 3.22±0.03** | 0.036±0.001*** | 280.97±1.73* | 1.72±0.01*** |
| Jacg81 | 3.53±0.08*** | 0.026±0.007* | 207.72±8.04 | 1.16±0.03* |
| Jacg121 | 3.58±0.12*** | 0.046±0.003*** | 303.57±4.77** | 2.25±0.01*** |
| Jacg189 | 1.93±0.02 | 0.035±0.003** | 327.84±0.94*** | 1.59±0.01** |
| Jacg243 | 1.47±0.04 | 0.020±0.001 | 261.70±3.00 | 0.98±0.01 |
| Chcg57 | 2.30±0.08 | 0.024±0.007 | 280.65±1.61* | 1.20±0.03* |
| CK | 1.08±0.01 | 0.008±0.001 | 161.93±3.55 | 0.93±0.01 |

Note: Data expressed as mean ± SE (n=3). The statistically significant difference between different *C. geophilum* ecotypes inoculation and non-inoculation treatments was tested by Mann-Whitney U test (* *P*<0.05; ** *P*<0.01; *** *P*<0.001). Pn, net photosynthetic rate; Gs, stomatal conductance; Ci, intercellular CO2 concentration; Tr, transpiration rate; CK, non-inoculation.

**
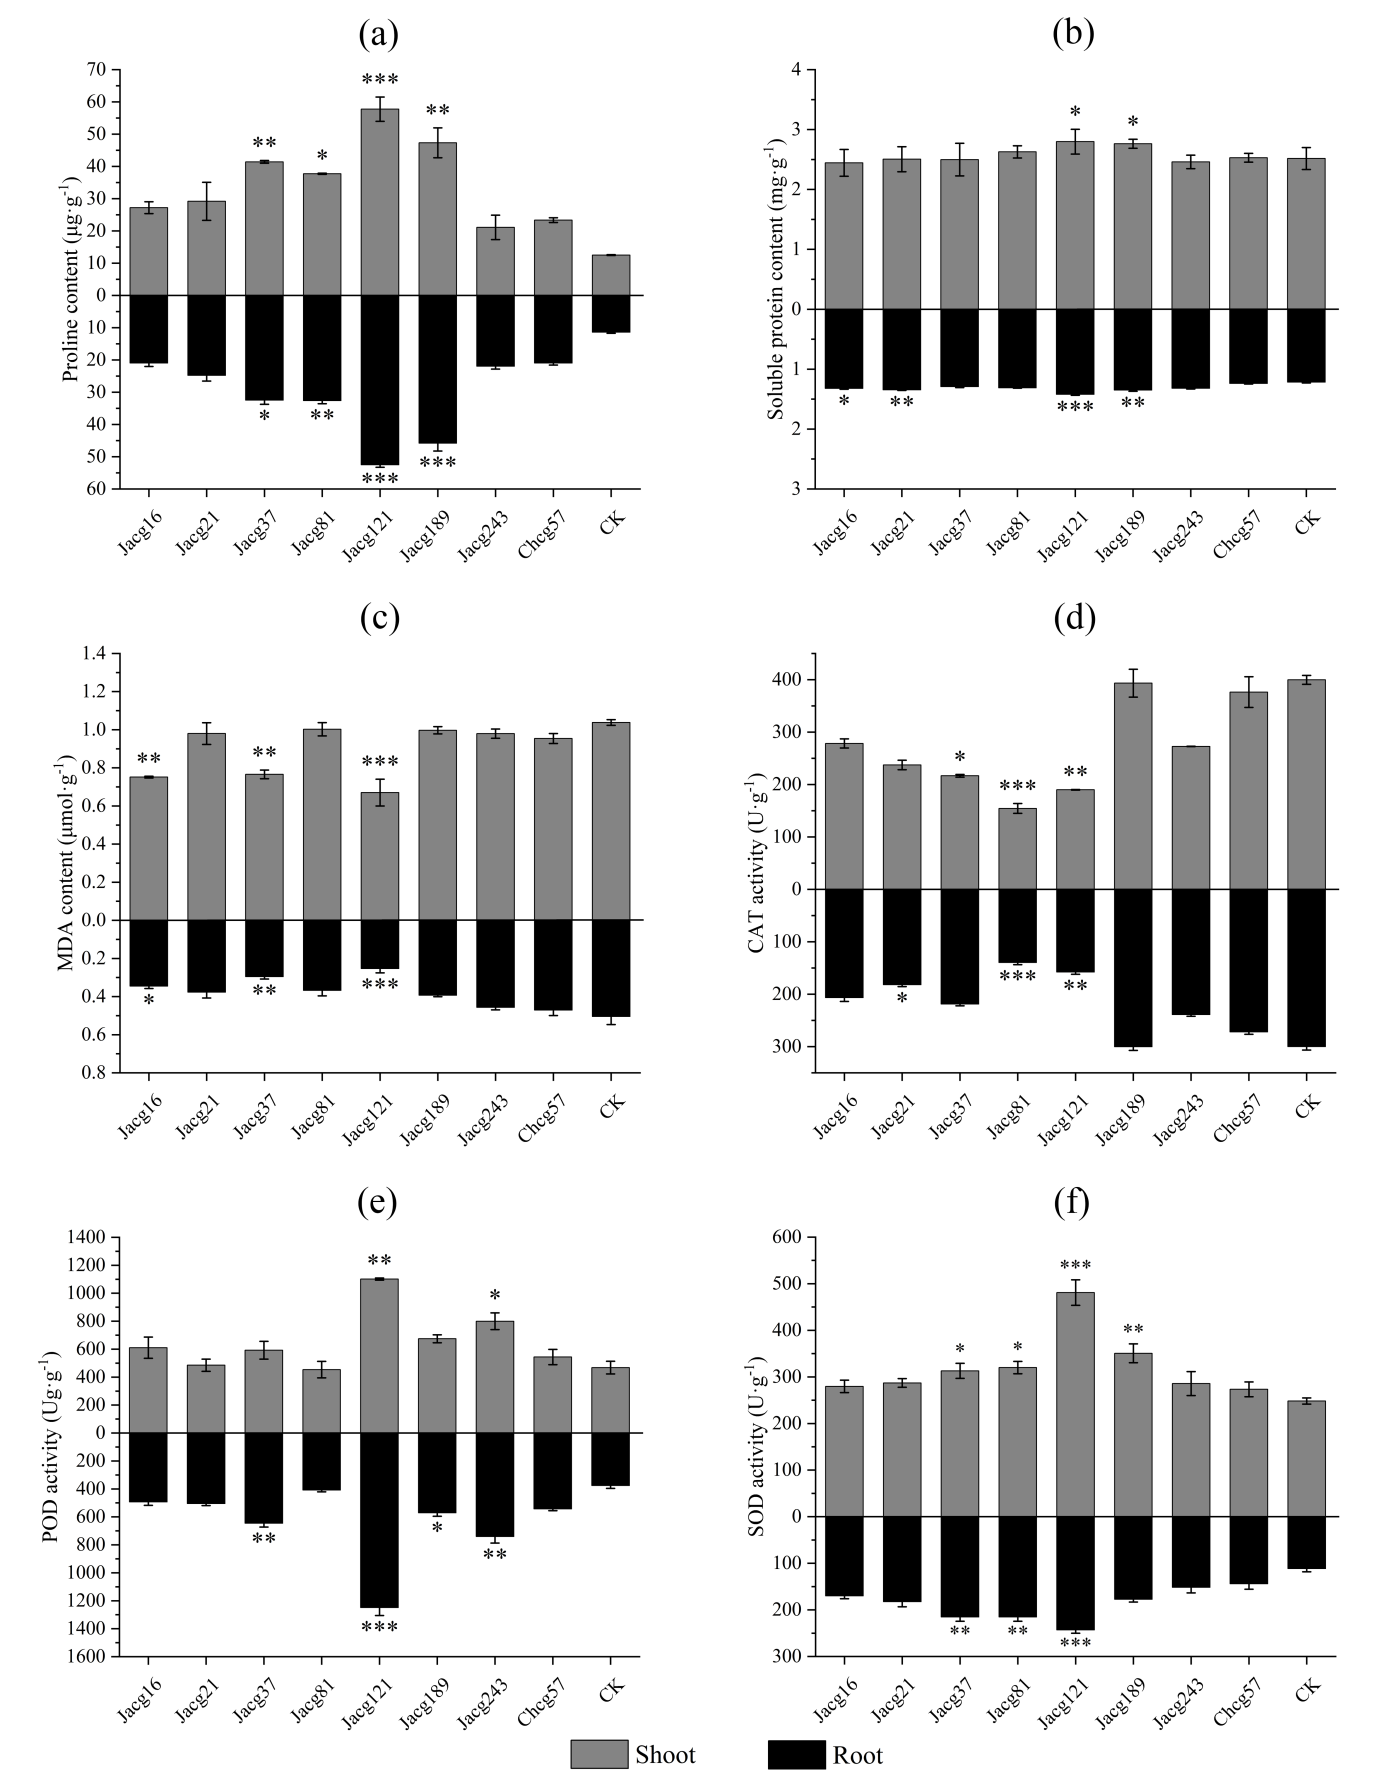
**

**Figure 4.** Effects of different *Cenococcum geophilum* ecotypes inoculation on the (a) proline content, (b) soluble protein content, (c) malondialdehyde (MDA) content, (d) catalase (CAT) activities, (e) peroxidase (POD) activities and (f) superoxide dismutase (SOD) activities of *Pinus massoniana* seedlings after 7 days of drought stress treatment (field capacity 30%-35%). Data and bars are shown as mean and ±SE of the replicates, respectively (n=3). The statistically significant difference between different *C. geophilum* ecotypes inoculation and non-inoculation treatments is tested by Mann-Whitney U test (* *P*<0.05; ** *P*<0.01; *** *P*<0.001). CK, non-inoculation.

**Table 2.** The value of comprehensive index (CI), index weight (W*j*), *µ*(*Xj*), *D* value (comprehensive evaluation of drought tolerance) and comprehensive evaluation in *Pinus massoniana* seedlings inoculated by different *Cenococcum geophilum* ecotypes after 7 days of drought stress (field capacity 30%-35%).

| Code | CI1 | CI2 | CI3 | *μ(X1)* | *μ(X2)* | *μ(X3)* | *D* | Comprehensive evaluation* |
| --- | --- | --- | --- | --- | --- | --- | --- | --- |
| Jacg16 | -0.083 | -0.382 | -1.990 | 0.437 | 0.354 | 0.000 | 0.386 | 6 |
| Jacg21 | -0.118 | -1.057 | -0.437 | 0.427 | 0.154 | 0.450 | 0.391 | 5 |
| Jacg37 | 0.555 | -0.492 | -0.107 | 0.610 | 0.321 | 0.545 | 0.564 | 3 |
| Jacg81 | 0.188 | -1.574 | 1.465 | 0.510 | 0.000 | 1.000 | 0.483 | 4 |
| Jacg121 | 1.991 | 0.511 | 0.417 | 1.000 | 0.619 | 0.697 | 0.919 | 1 |
| Jacg189 | 0.319 | 1.792 | 0.337 | 0.546 | 1.000 | 0.673 | 0.621 | 2 |
| Jacg243 | -0.454 | 0.230 | -0.627 | 0.336 | 0.536 | 0.394 | 0.369 | 7 |
| Chcg57 | -0.704 | 0.580 | -0.060 | 0.268 | 0.640 | 0.559 | 0.347 | 8 |
| CK | -1.693 | 0.393 | 1.002 | 0.000 | 0.584 | 0.866 | 0.160 | 9 |
| Index weight (w*j*) |  |  |  | 0.770 | 0.140 | 0.09 |  |  |

Note: CK, non-inoculation; *, the lower level indicates the higher drought tolerance.


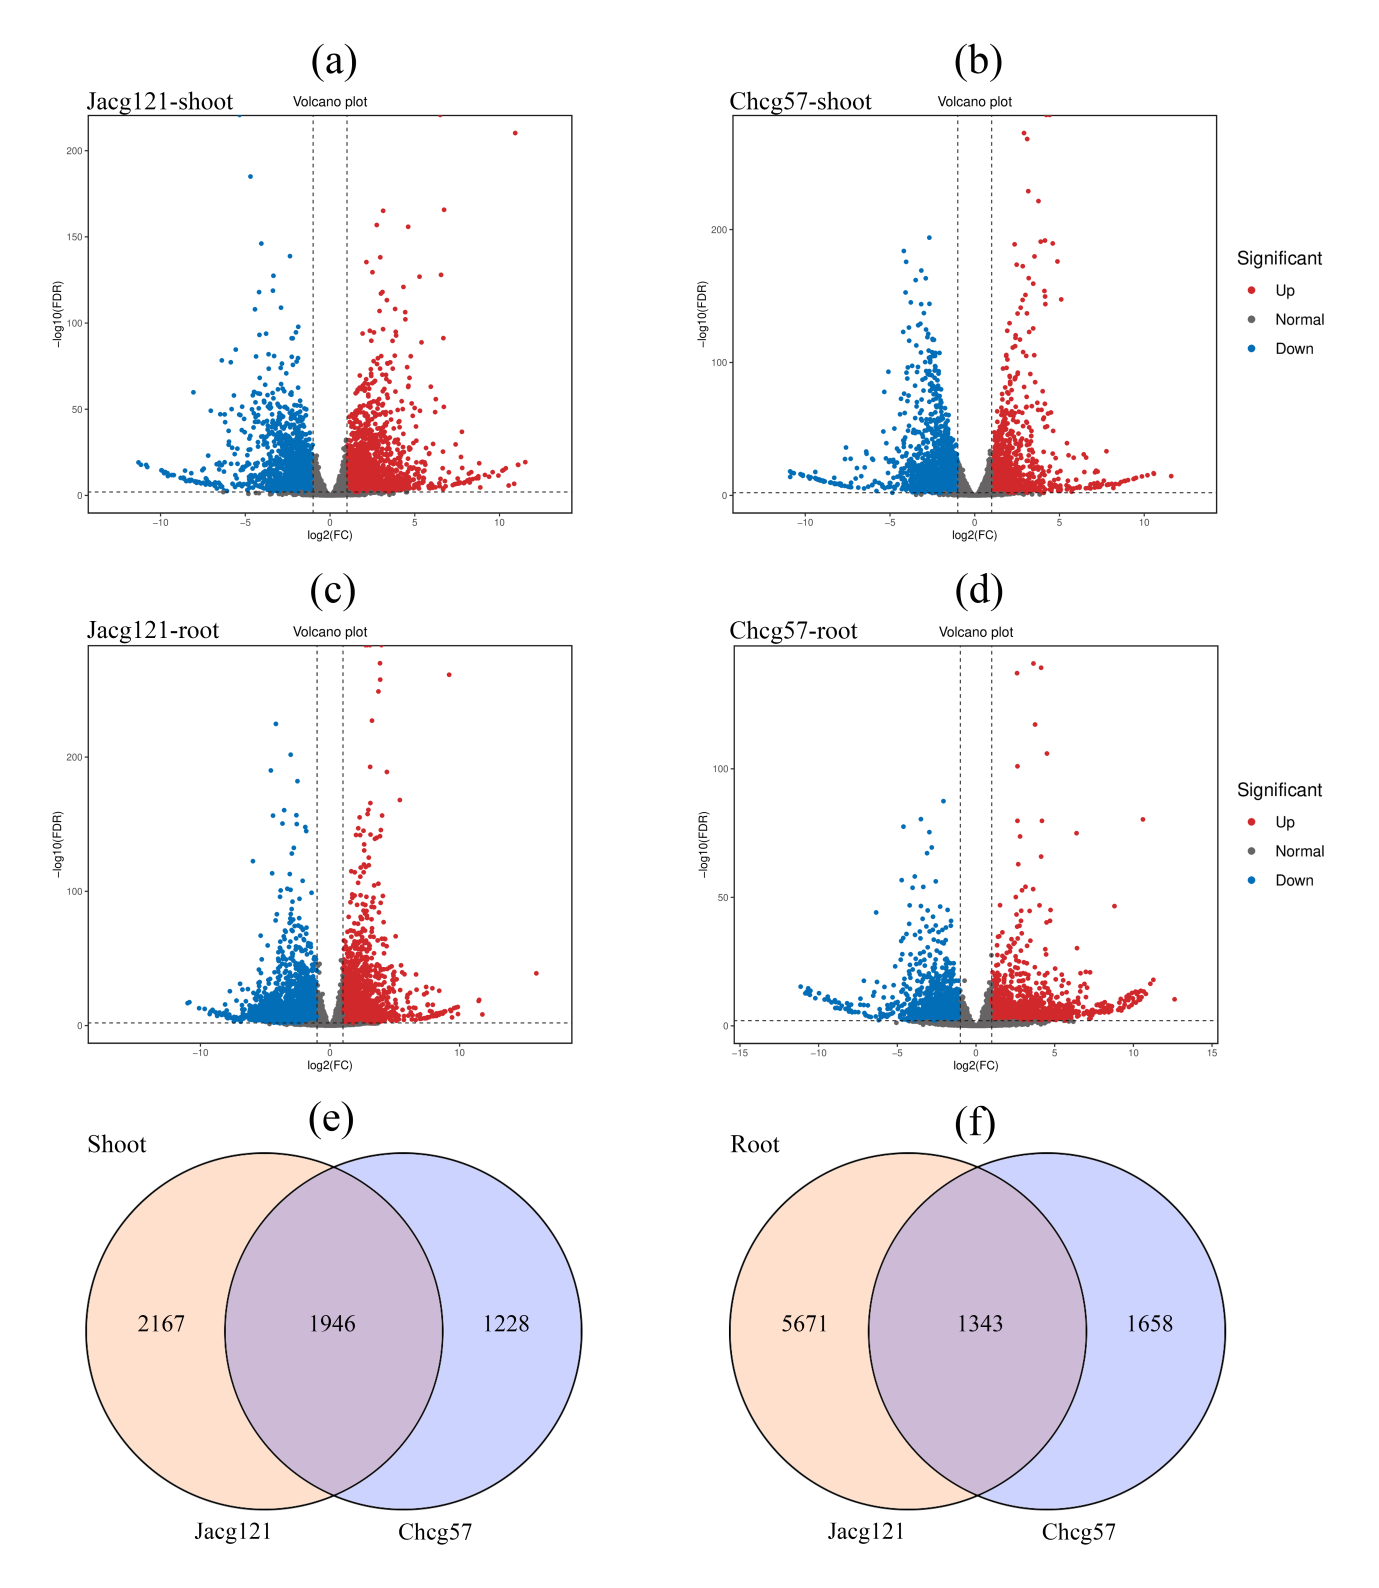


**Figure 5.** Volcano (a-d) and Wenn (e, f) maps of differentially expressed genes (DEGs) analysis of drought-tolerant (Jacg121) and drought-sensitive (Chcg57) seedlings of *Pinus massoniana* inoculated by *Cenococcum geophilum* after 7 days of drought (field capacity 30%-35%) and well-watered (field capacity 85%-90%) treatments. Red spot indicates significant up-regulated genes after drought treatment; blue spot indicates significantly down-regulated genes; and gray spot indicates no-change genes. |log2Foldchange| ≥ 2 are used as the screening criteria of DEGs.


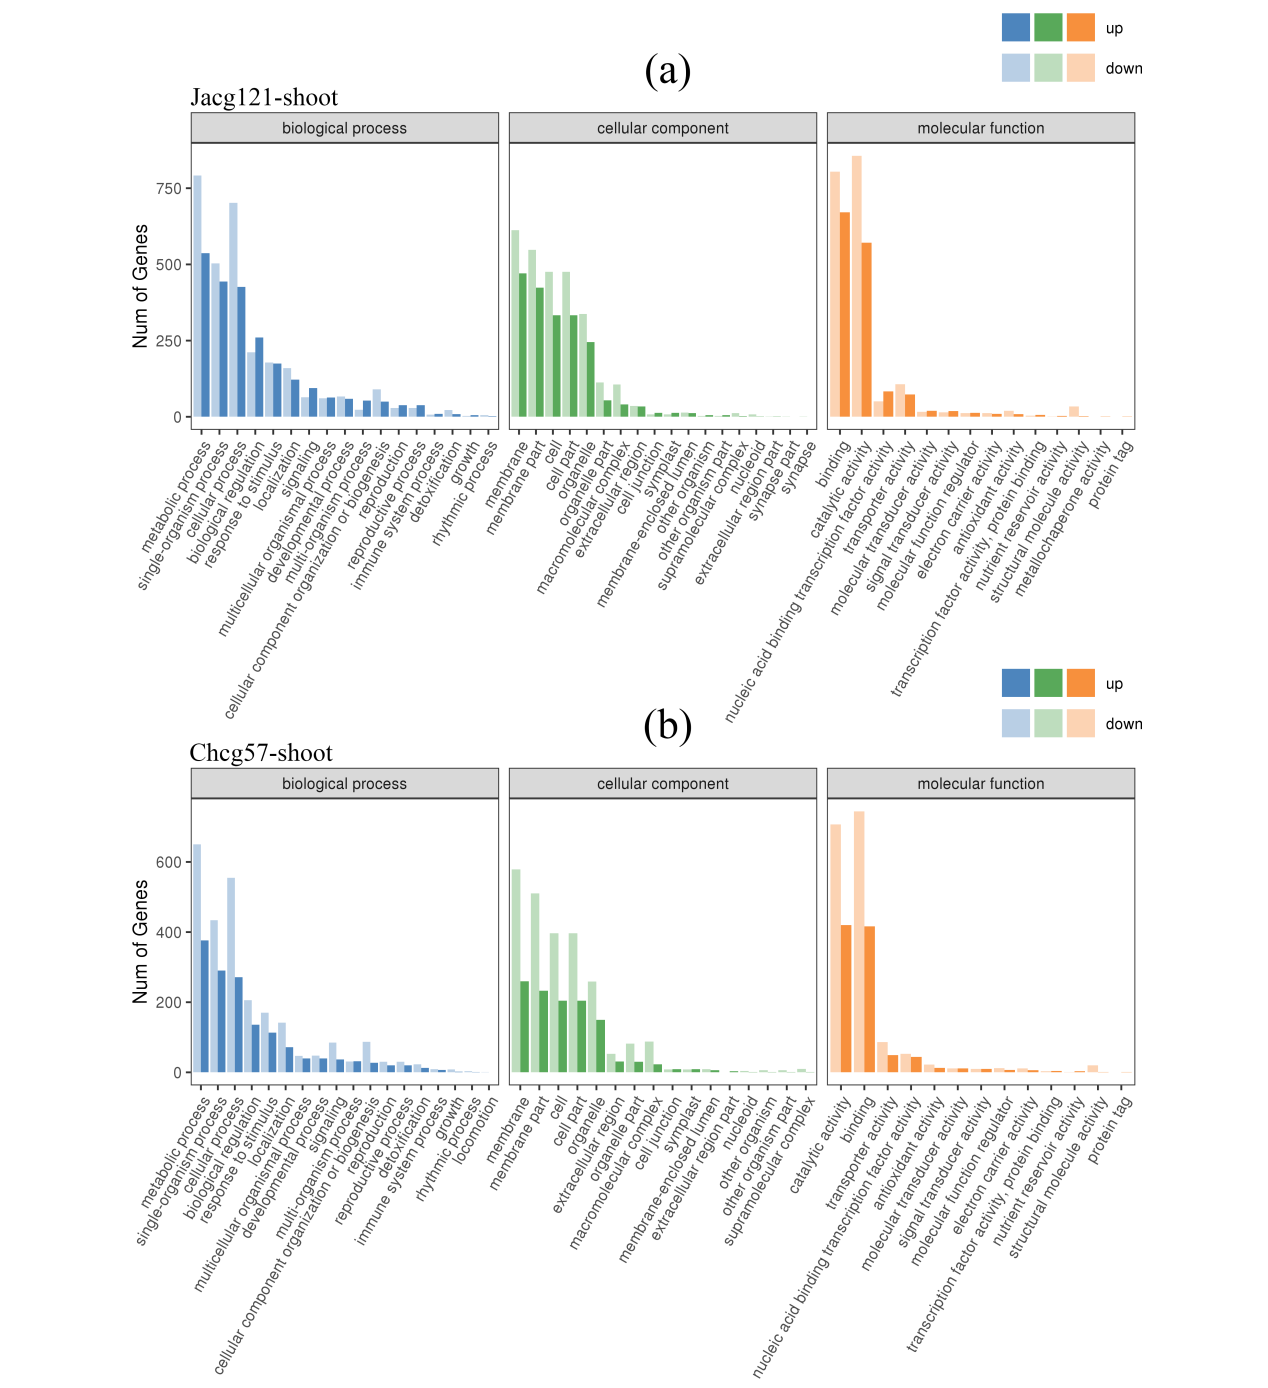


**Figure 6.** Gene ontology (GO) enrichment analysis of the differentially expressed genes (DEGs) in shoots of drought-tolerant (Jacg121) (a) and drought-sensitive (Chcg57) (b) seedlings of *Pinus massoniana* inoculated by *Cenococcum geophilum* after 7 days of drought (field capacity 30%-35%) and well-watered (field capacity 85%-90%) treatments. The abscissa is the GO classification, and the ordinate is the number of genes.


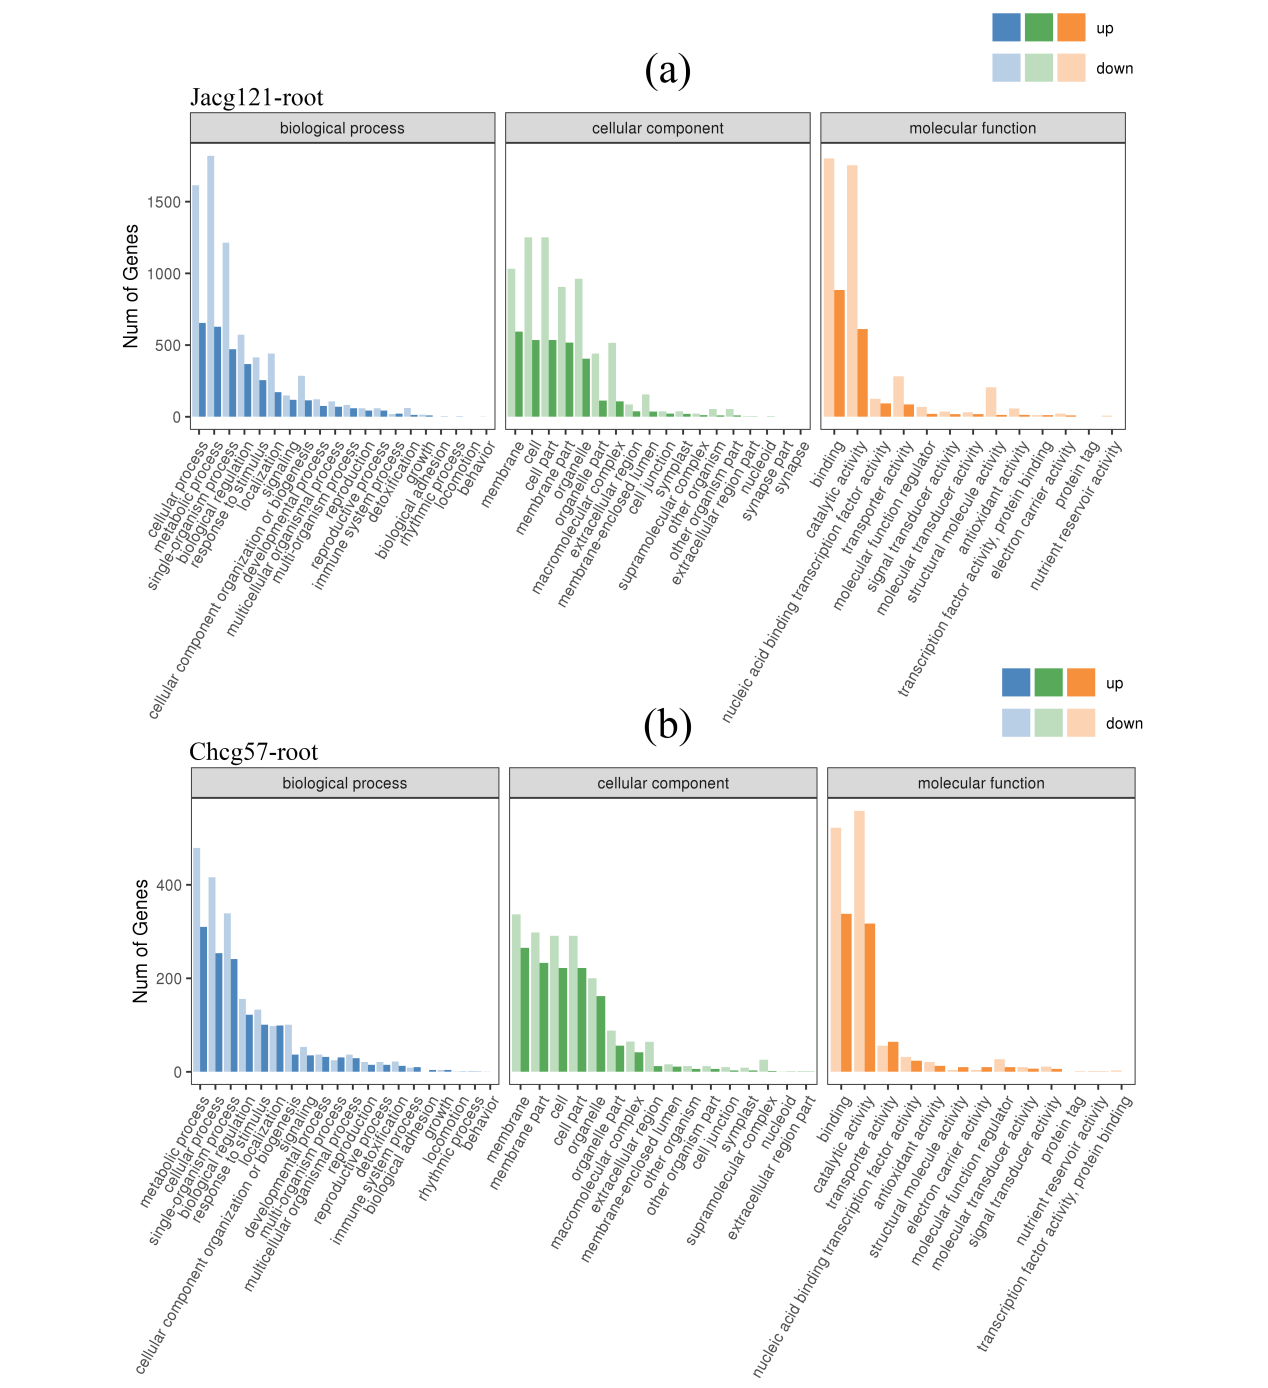


**Figure 7.** Gene ontology (GO) enrichment analysis of the differentially expressed genes (DEGs) in roots of drought-tolerant (Jacg121) (a) and drought-sensitive (Chcg57) (b) seedlings of *Pinus massoniana* inoculated by *Cenococcum geophilum* after 7 days of drought (field capacity 30%-35%) and well-watered (field capacity 85%-90%) treatments. The abscissa is the GO classification, and the ordinate is the number of genes.


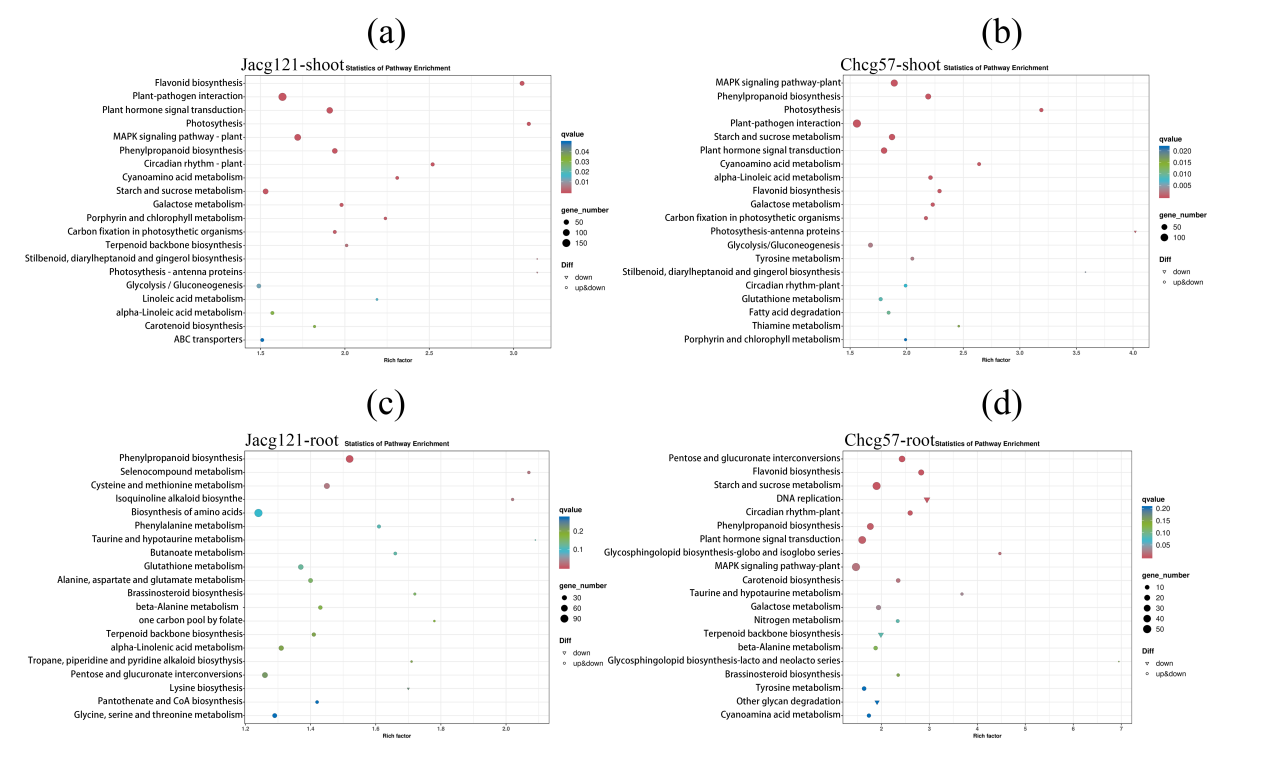


**Figure 8.** The Kyoto Encyclopedia of Genes and Genomes (KEGG) enrichment analysis of differentially expressed genes (DEGs) in shoots and roots of drought-tolerant (Jacg121) (a, c) and drought-sensitive (Chcg57) (b, d) seedlings of *Pinus massoniana* inoculated by *Cenococcum geophilum* after 7 days of drought (field capacity 30%-35%) and well-watered (field capacity 85%-90%) treatments. The size of the symbol represents the numbers of DEGs involved in the corresponding pathway.


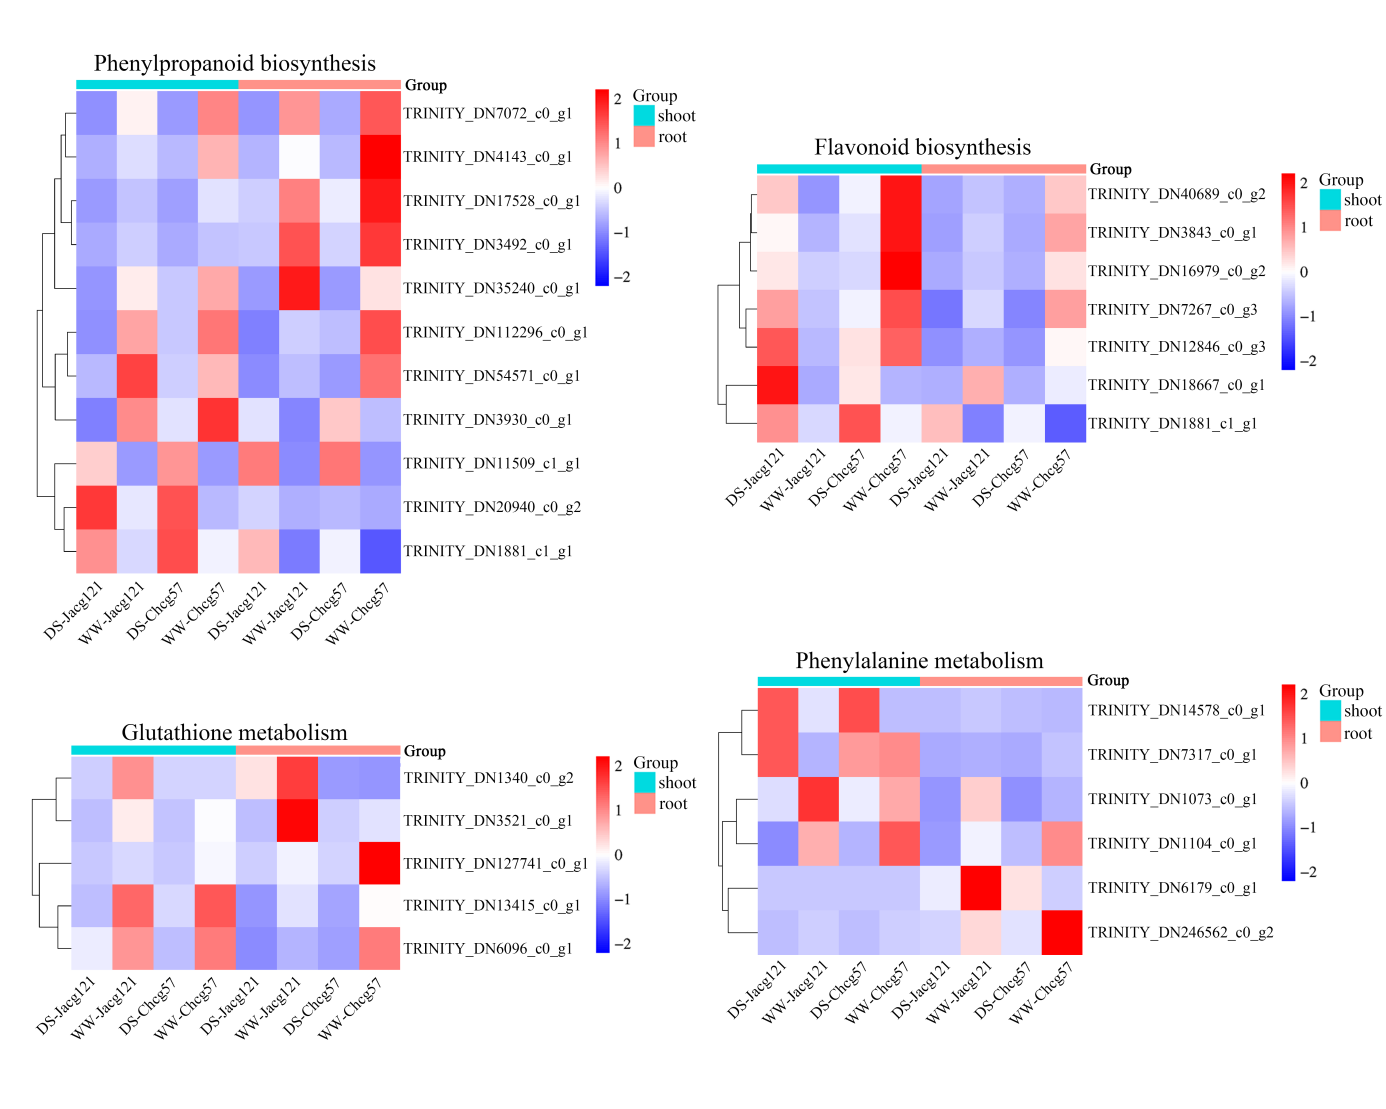


**Figure 9.** The heatmaps of part up-regulated or down-regulated differentially expressed genes (DEGs) in different pathways of drought-tolerant (Jacg121) and drought-sensitive (Chcg57) seedlings of *Pinus massoniana* inoculated by *Cenococcum geophilum* after 7 days of drought (field capacity 30%-35%) and well-watered (field capacity 85%-90%) treatments. The Y- and X-axes represent the DEGs and different samples, respectively. The different colors of the heatmaps, ranging from blue over white to red, represent scaled expression levels of genes with [log2 (FPKM + 1)] across different samples. DS, drought stress; WW, well-watered.


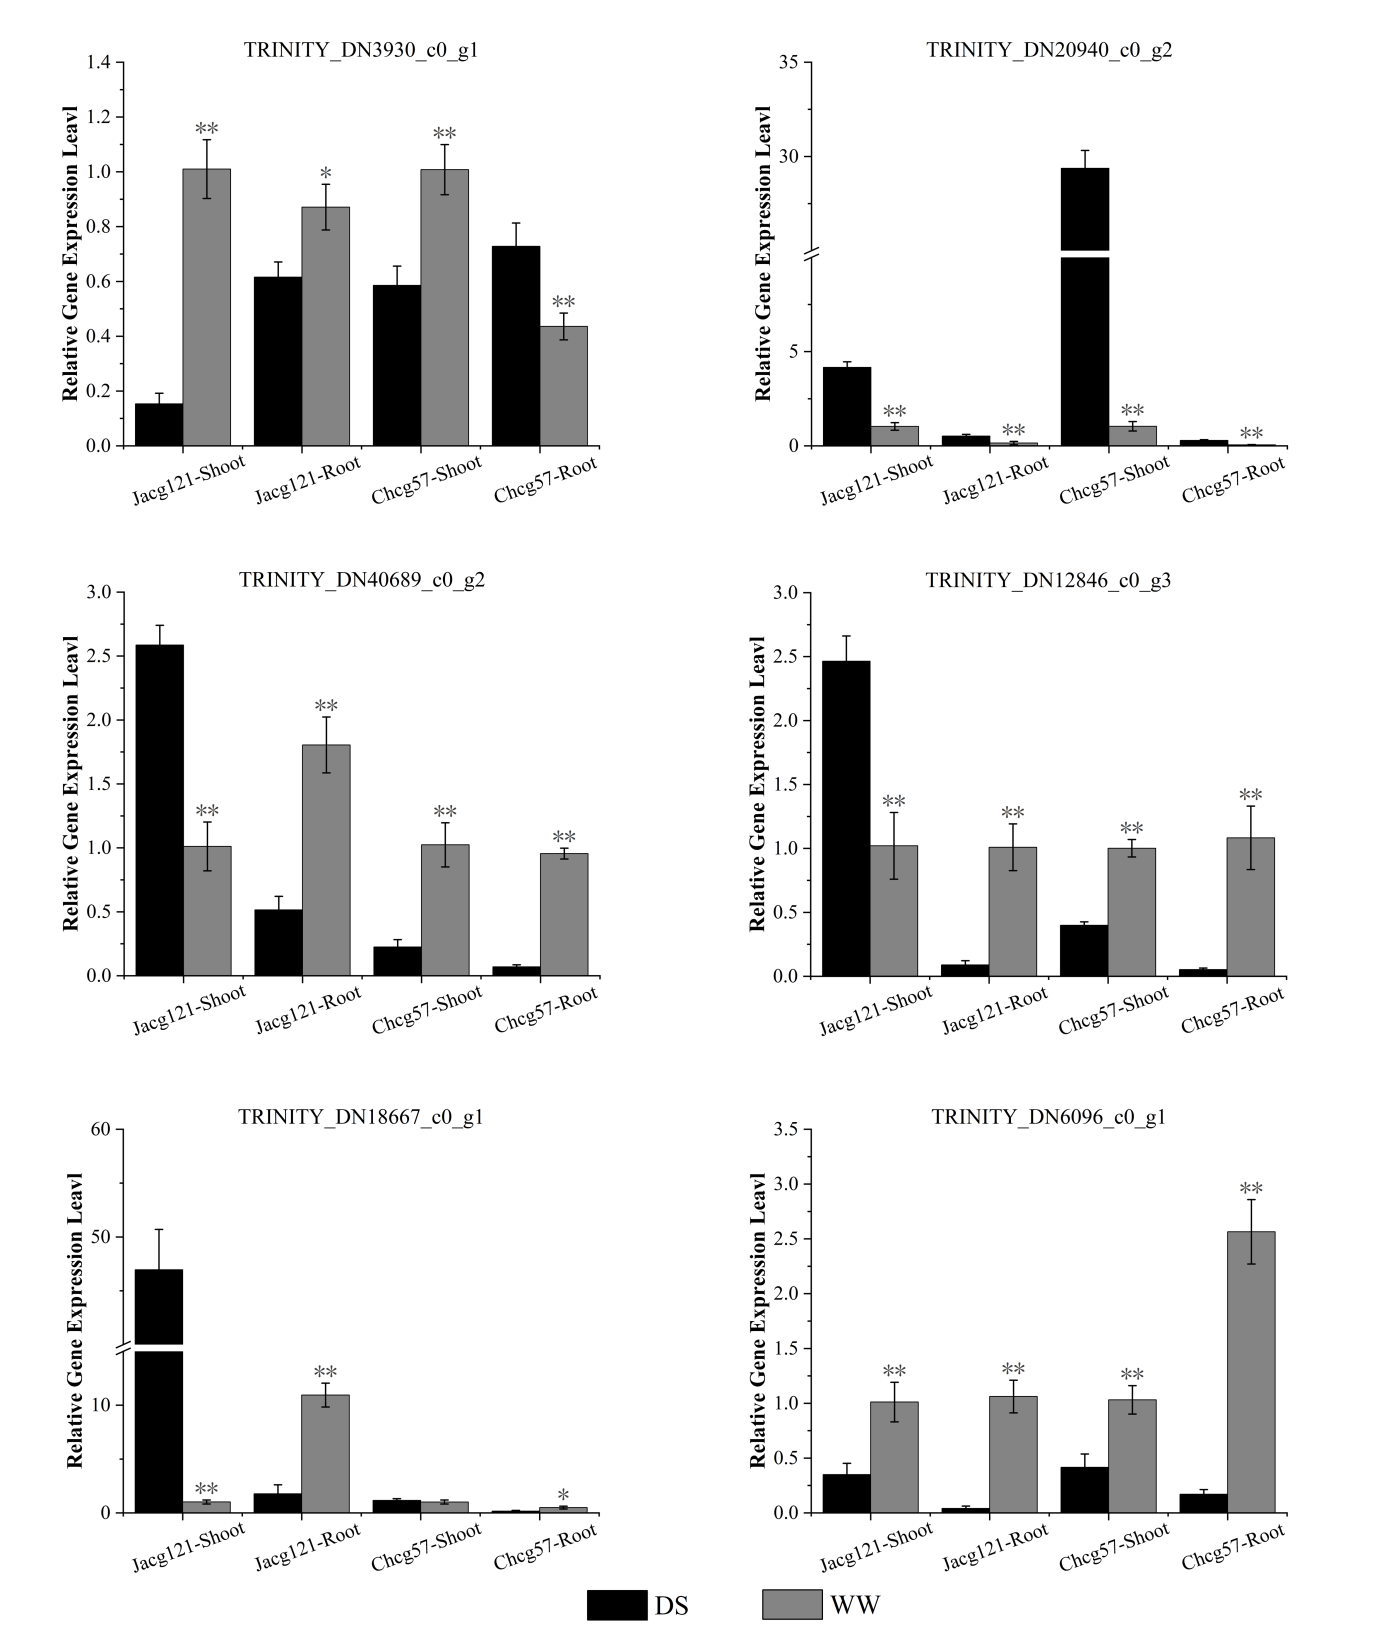


**Figure 10.** The relative expression levels of six candidate genes in drought-tolerant (Jacg121) and drought-sensitive (Chcg57) seedlings of *Pinus massoniana* inoculated by *Cenococcum geophilum* were analyzed by RT-qPCR after 7 days of drought (field capacity 30%-35%) and well-watered (field capacity 85%-90%) treatments. The relative expression changes of candidate genes in different treatments were calculated by 2- △△Ct method and expressed as mean and ± SE (n=3). The statistically significant difference between drought and well-watered treatments is tested by Student’ s *t*-test (* *P*<0.05; ** *P*<0.01). WW, well-watered; DS, drought stress.


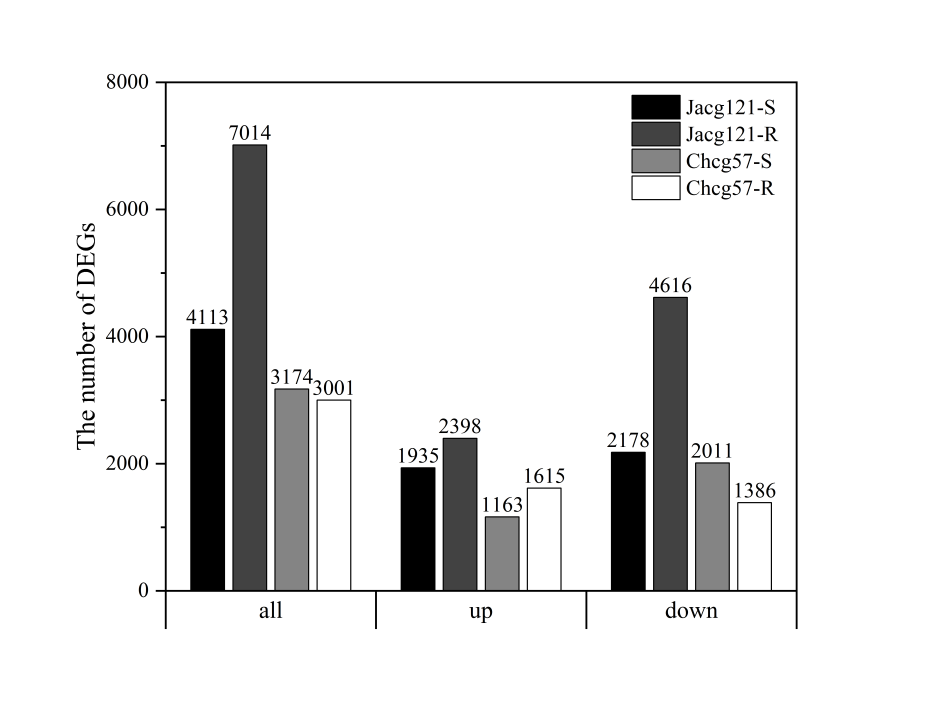


**Supplemental Figure S1.** The number of DEGs in highest drought-tolerant and lowest drought-tolerant mycorrhizal seedlings under drought (field capacity 30%-35%) and well-watered (field capacity 85%-90%) treatments. S, shoot; R, root.

**Supplemental Table S1.** Geographic information of different ecotypes of *Cenococcum geophilum*.

| Isolate | Isolate location |
| --- | --- |
| Jacg16 | Miyasaki, Japan |
| Jacg21 | Miyasaki, Japan |
| Jacg37 | Numazu Senbonhama, Japan |
| Jacg81 | Nagano, Japan |
| Jacg121 | Tokyo, Japan |
| Jacg189 | Tokyo, Japan |
| Jacg243 | The Ryukyus University, Japan |
| Chcg57 | Qinghai Province, China |

**Supplemental Table S2.** Correlation coefficient matrix of single index of different ecotypes mycorrhizal seedlings after 7 days of drought stress (field capacity 30%-35%).

| Index | SWR | RWC | Pn | Gs | Ci | Tr | CAT(S) | CAT(R) | POD(S) | POD(R) | SOD(S) | SOD(R) | MDA(S) | MDA(R) | PRO(S) | PRO(R) | SP(S) | SP(R) |
| --- | --- | --- | --- | --- | --- | --- | --- | --- | --- | --- | --- | --- | --- | --- | --- | --- | --- | --- |
| SWR | 1.000 |  |  |  |  |  |  |  |  |  |  |  |  |  |  |  |  |  |
| RWC | 0.963** | 1.000 |  |  |  |  |  |  |  |  |  |  |  |  |  |  |  |  |
| Pn | 0.672* | 0.611 | 1.000 |  |  |  |  |  |  |  |  |  |  |  |  |  |  |  |
| Gs | 0.801** | 0.787* | 0.717* | 1.000 |  |  |  |  |  |  |  |  |  |  |  |  |  |  |
| Ci | 0.670* | 0.672* | 0.121 | 0.697* | 1.000 |  |  |  |  |  |  |  |  |  |  |  |  |  |
| Tr | 0.582 | 0.576 | 0.670* | 0.929** | 0.500 | 1.000 |  |  |  |  |  |  |  |  |  |  |  |  |
| CAT(S) | -0.666 | -0.567 | -0.757* | -0.457 | 0.008 | -0.353 | 1.000 |  |  |  |  |  |  |  |  |  |  |  |
| CAT(R) | -0.693* | -0.585 | -0.735* | -0.360 | 0.038 | -0.236 | 0.919** | 1.000 |  |  |  |  |  |  |  |  |  |  |
| POD(S) | 0.624 | 0.618 | 0.307 | 0.724* | 0.586 | 0.711* | -0.396 | -0.307 | 1.000 |  |  |  |  |  |  |  |  |  |
| POD(R) | 0.572 | 0.559 | 0.443 | 0.740* | 0.468 | 0.800** | -0.395 | -0.333 | 0.943** | 1.000 |  |  |  |  |  |  |  |  |
| SOD(S) | 0.666 | 0.636 | 0.650 | 0.873** | 0.451 | 0.903** | -0.479 | -0.446 | 0.836** | 0.865** | 1.000 |  |  |  |  |  |  |  |
| SOD(R) | 0.869** | 0.822** | 0.902** | 0.842** | 0.361 | 0.741* | -0.823** | -0.77* | 0.563 | 0.584 | 0.785* | 1.000 |  |  |  |  |  |  |
| MDA(S) | -0.761* | -0.707* | -0.415 | -0.544 | -0.490 | -0.478 | 0.471 | 0.540 | -0.520 | -0.56 | -0.481 | -0.607 | 1.000 |  |  |  |  |  |
| MDA(R) | -0.892** | -0.837** | -0.743* | -0.819** | -0.486 | -0.729* | 0.725* | 0.685* | -0.596 | -0.596 | -0.741* | -0.93** | 0.819** | 1.000 |  |  |  |  |
| Pro(S) | 0.779* | 0.780* | 0.747* | 0.953** | 0.557 | 0.894** | -0.503 | -0.438 | 0.661 | 0.655 | 0.902** | 0.888** | -0.480 | -0.84** | 1.000 |  |  |  |
| Pro(R) | 0.702* | 0.726* | 0.661 | 0.927** | 0.555 | 0.882** | -0.411 | -0.343 | 0.710* | 0.687* | 0.921** | 0.809** | -0.355 | -0.73* | 0.979** | 1.000 |  |  |
| SP(S) | 0.611 | 0.600 | 0.648 | 0.864** | 0.450 | 0.865** | -0.367 | -0.345 | 0.660 | 0.661 | 0.940** | 0.760* | -0.306 | -0.678* | 0.945** | 0.970** | 1.000 |  |
| SP(R) | 0.812** | 0.842** | 0.476 | 0.709* | 0.500 | 0.601 | -0.545 | -0.578 | 0.809** | 0.713* | 0.819** | 0.755* | -0.580 | -0.754* | 0.789** | 0.803** | 0.755* | 1.000 |

Note: SWC and RWC, shoot and root water contents; Pn, net photosynthetic rate; Gs, stomatal conductance; Ci, intercellular CO2 concentration; Tr, transpiration rate; CAT, POD, and SOD, catalase, peroxidase, and superoxide dismutase activities; Pro, proline content; SP and SP, soluble protein contents; MDA, malondialdehyde (MDA) contents, S, shoot; R, root. * and ** mean significant differences at the levels of *P* < 0.05 and *P* < 0.01, respectively.

**Supplemental Table S3.** The index coefficient and proportion of comprehensive coefficient *CI* (comprehensive index).

| Principle factors | *CI1* | *CI2* | *CI3* |
| --- | --- | --- | --- |
| Eigen values | 12.317 | 2.225 | 1.39 |
| Contributive ratio | 68.426 | 12.359 | 7.722 |
| Cumulative contributive ratio | 68.426 | 80.785 | 88.508 |
| Eigenevector |  |  |  |
| SWR | 0.073 | -0.092 | -0.239 |
| RWC | 0.071 | -0.051 | -0.247 |
| Pn | 0.062 | -0.179 | 0.272 |
| Gs | 0.076 | 0.102 | 0.041 |
| Ci | 0.047 | 0.213 | -0.384 |
| Tr | 0.069 | 0.148 | 0.18 |
| CAT(S) | -0.053 | 0.302 | -0.075 |
| CAT(R) | -0.05 | 0.334 | -0.013 |
| POD(S) | 0.064 | 0.151 | -0.119 |
| POD(R) | 0.064 | 0.131 | -0.027 |
| SOD(S) | 0.074 | 0.104 | 0.163 |
| SOD(R) | 0.076 | -0.135 | 0.095 |
| MDA(S) | -0.055 | 0.096 | 0.391 |
| MDA(R) | -0.074 | 0.106 | 0.092 |
| PRO(S) | 0.077 | 0.065 | 0.139 |
| PRO(R) | 0.073 | 0.125 | 0.175 |
| SP(S) | 0.069 | 0.127 | 0.257 |
| SP(R) | 0.071 | 0.013 | -0.107 |

Note: *CI*, comprehensive index; SWC and RWC, shoot and root water contents; Pn, net photosynthetic rate; Gs, stomatal conductance; Ci, intercellular CO2 concentration; Tr, transpiration rate; CAT, POD, and SOD, catalase, peroxidase, and superoxide dismutase activities; Pro, proline content; SP and SP, soluble protein contents; MDA, malondialdehyde (MDA) contents, S, shoot; R, root.

**Supplemental Table S4.** List of transcriptome data quality.

| SampleID | Clean Reads | Mapped Reads | Mapped Ratio | Base Number |
| --- | --- | --- | --- | --- |
| S121-DS1 | 22,950,191 | 6,871,129,962 | 45.74% | 95.98% |
| S121-DS2 | 21,220,386 | 6,353,254,570 | 46.13% | 95.88% |
| S121-DS3 | 22,095,266 | 6,616,185,438 | 46.06% | 95.75% |
| S121-WW1 | 23,767,903 | 7,116,748,812 | 46.49% | 95.79% |
| S121-WW2 | 19,695,861 | 5,893,797,682 | 46.61% | 95.60% |
| S121-WW3 | 23,547,580 | 7,050,286,352 | 46.31% | 95.51% |
| S57-DS1 | 21,223,106 | 6,356,316,998 | 45.55% | 95.41% |
| S57-DS2 | 21,984,327 | 6,581,915,034 | 45.46% | 95.51% |
| S57-DS3 | 21,435,830 | 6,417,880,884 | 45.95% | 95.85% |
| S57-WW1 | 20,837,390 | 6,237,924,178 | 47.03% | 95.66% |
| S57-WW2 | 20,113,617 | 6,022,856,442 | 46.58% | 95.03% |
| S57-WW3 | 21,745,303 | 6,509,574,290 | 46.90% | 95.92% |
| R121-DS1 | 21,972,497 | 6,575,392,614 | 46.40% | 95.60% |
| R121-DS2 | 20,899,011 | 6,255,863,804 | 46.14% | 95.35% |
| R121-DS3 | 20,166,029 | 6,036,205,202 | 45.46% | 95.20% |
| R121-WW1 | 20,995,108 | 6,284,374,384 | 47.01% | 95.42% |
| R121-WW2 | 20,880,607 | 6,251,771,070 | 47.28% | 95.88% |
| R121-WW3 | 19,220,048 | 5,750,275,160 | 46.80% | 95.82% |
| R57-DS1 | 21,598,880 | 6,462,707,120 | 46.63% | 94.58% |
| R57-DS2 | 21,395,481 | 6,403,622,146 | 45.87% | 94.98% |
| R57-DS3 | 20,113,218 | 6,013,574,536 | 46.56% | 95.68% |
| R57-WW1 | 20,463,370 | 6,122,283,592 | 46.30% | 95.82% |
| R57-WW2 | 21,059,284 | 6,303,590,750 | 46.46% | 95.75% |
| R57-WW3 | 20,178,868 | 6,037,348,128 | 46.20% | 95.42% |

Note: S, Shoot; R, root; DS, drought stress; WW, well-watered;

**Supplemental Table S5.** Unigene length distribution statistics.

| Length Range | Transcript | Unigene |
| --- | --- | --- |
| 300-500 | 14,575(21.12%) | 10,201(31.85%) |
| 500-1000 | 7,271(10.53%) | 3,772(11.78%) |
| 1000-2000 | 10,186(14.76%) | 5,057(15.79%) |
| >2000 | 36,989(53.59%) | 13,002(40.59%) |
| Total Number | 69,021 | 32,032 |
| Total Length | 144,203,542 | 55,051,729 |
| N50 Length | 2,846 | 2,673 |
| Mean Length | 2089.27 | 1718.65 |

**Supplemental Table S6.** Sequences of primers used for RT-qPCR analysis.

| Gene-ID | Primer orientation | Primer sequence |
| --- | --- | --- |
| TRINITY_DN14578_c0_g1 | Forward | TCTATCCCACGCCTCTTCCA |
| Reverse | AGCCCTCAACGACATCAAGG |
| TRINITY_DN3930_c0_g1 | Forward | CACGGTCACGCATTGACATC |
| Reverse | GCCTTCGACCCAGCTCTATC |
| TRINITY_DN6096_c0_g1 | Forward | ACGACTGGACAATACGCTCG |
| Reverse | CCGCAGCCAGGATACATAGG |
| TRINITY_DN11509_c1_g1 | Forward | ACGGTGGCATGCACAGAATA |
| Reverse | TTCCAGTTGCCTCACTCGTC |
| TRINITY_DN12846_c0_g3 | Forward | AGCTGATCCCGTTCCTTTGG |
| Reverse | GGAATGCCTCCACCAGACTC |
| TRINITY_DN18667_c0_g1 | Forward | AACAACGTCAACCTGCCTGA |
| Reverse | GGTCGTTCAGTCTCTGGTGG |
| TRINITY_DN20940_c0_g2 | Forward | AGGGACTCATGCAGACAATCT |
| Reverse | GCATAAGGTGCCTCTCCGAC |
| TRINITY_DN40689_c0_g2 | Forward | GCGCGCTCACATTTCTTCTG |
| Reverse | TATTCACCAGCCCTCTGTGC |
| Aquaporin protein gene | Forward | CACCTTGCCACAATTCCTATCA |
| Reverse | TCCAATGGTCATCCCAAACAC |
